# Supplementary material
Source: PubMed Central journal article supplement (PMC3612910)
Supplement: neo1504_0373SD1.pdf [file neo1504_0373SD1.pdf]

**Table W1.** Clinical Parameters of Samples Used in ERRBS.

| PCa | STID No. | Serum PSA (ng/ml) | Age at Diagnosis | Gleason Score (H&E) | Pathological Stage | EST-Fusion Status | Year of Radical Prostatectomy |
|-----|----------|-------------------|------------------|---------------------|--------------------|-------------------|-------------------------------|
| 1   | 508      | 7.8               | 57               | 3 + 4 = 7           | T2c                | NEG               | 2007                          |
| 2   | 581      | 9.2               | 69               | 4 + 5 = 9           | T3b                | POS               | 2007                          |
| 3   | 1701     | 2.1               | 62               | 3 + 4 = 7           | T3a                | POS               | 2007                          |
| 4   | 1783     | 9.8               | 66               | 4 + 4 = 8           | T2c                | NEG               | 2008                          |
| 5   | 2832     | 6.6               | 66               | 3 + 4 = 7           | T2c                | POS               | 2007                          |
| 6   | 3027     | 10.2              | 66               | 4 + 4 = 8           | T3b                | NEG               | 2008                          |
| 7   | 3043     | 7.2               | 69               | 3 + 4 = 7           | T2c                | NEG               | 2008                          |

  

| CRPC | STID No. | Serum PSA (ng/ml) | Age at Diagnosis | Metastatic | AR Status | Overall Survival | EST-Fusion Status | Tissue Type |
|------|----------|-------------------|------------------|------------|-----------|------------------|-------------------|-------------|
| 1    | 4240     | 1.93              | 74               | –          | (–)       | 13 months        | NEG               | NEPC        |
| 2    | 7520     | 0.06              | 56               | Yes        | (–)       | Alive            | POS               | NEPC        |
| 3    | 7820     | –                 | –                | –          | (–)       | 9 months         | NEG               | NEPC        |
| 4    | 7821     | –                 | –                | –          | (–)       | 9 months         | NEG               | NEPC        |
| 5    | 8220     | –                 | –                | –          | (–)       | –                | NEG               | NEPC        |
| 6    | 8740     | 48.5              | 59               | Yes        | (–)       | 3 months         | NEG               | NEPC        |

**Table W2.** Clinical Parameters of FFPE Samples of PCa and CRPC Used in the Validation Cohort.

| PCa  | STID No.  | Serum PSA (ng/ml) | Age at Diagnosis | Gleason Score (H&E) | Pathological Stage | Benign in the Cohort | Year of Radical Prostatectomy |
|------|-----------|-------------------|------------------|---------------------|--------------------|----------------------|-------------------------------|
| FF23 | S10-25464 | 15                | 74               | 4 + 3 = 7           | T2c                | FF22                 | 2010                          |
| FF25 | S10-17814 | 5.94              | 70               | 3 + 4 = 7           | T2a                | FF24                 | 2010                          |
| FF29 | S10-29475 | 7.4               | 69               | 4 + 5 = 9           | T3a                | FF28                 | 2010                          |
| FF31 | S09-21599 | 5.6               | 62               | 3 + 4 = 7           | T2c                | FF30                 | 2009                          |
| FF33 | S08-6573  | –                 | 65               | 3 + 4 = 7           | T2c                | FF32                 | 2008                          |
| FF35 | S08-25678 | 4.98              | 68               | 4 + 3 = 7           | T2c                | FF34                 | 2008                          |
| FF37 | S08-15334 | –                 | 58               | 4 + 3 = 7           | T3a                | FF36                 | 2008                          |
| FF39 | S07-30717 | 8.8               | 63               | 3 + 4 = 7           | T3b                | FF38                 | 2007                          |
| FF41 | S07-29284 | 5.4               | 61               | 3 + 4 = 7           | T2c                | n/a                  | 2007                          |
| FF43 | S07-30675 | –                 | 50               | 3 + 4 = 7           | T2c                | FF42                 | 2007                          |
| FF45 | S07-28150 | –                 | 58               | 3 + 4 = 7           | T2c                | FF44                 | 2007                          |
| FF47 | S07-28191 | –                 | 57               | 3 + 4 = 7           | T2c                | FF46                 | 2007                          |
| FF49 | S07-30522 | –                 | 63               | 3 + 4 = 7           | T2c                | FF48                 | 2007                          |
| FF51 | S07-31303 | –                 | 60               | 3 + 4 = 7           | T2c                | FF50                 | 2007                          |
| FF53 | S07-29250 | –                 | 55               | 3 + 3 = 6           | T2a                | FF52                 | 2007                          |
| FF63 | S06-1447  | 3.15              | 55               | 5 + 4 = 9           | T4                 | n/a                  | 2006                          |

  

| CRPC | STID No.  | Tissue Type | Serum PSA (ng/ml) | Age at Diagnosis | Metastatic | Prior Chemotherapy | AR Status | Benign in the Cohort |
|------|-----------|-------------|-------------------|------------------|------------|--------------------|-----------|----------------------|
| FF12 | 1633/04   | NEPC        | –                 | –                | –          | –                  | (+)       | n/a                  |
| FF14 | 10586     | NEPC        | –                 | –                | –          | –                  | (–)       | FF13                 |
| FF16 | 21771/07  | NEPC        | –                 | –                | –          | –                  | (+)       | FF15                 |
| FF18 | S05-31294 | NEPC        | 5.9               | 63               | –          | No                 | (+)       | FF17                 |
| FF20 | S10-5780  | NEPC        | –                 | 69               | yes        | Yes                | (–)       | FF19                 |
| FF55 | S97-1161  | NEPC        | –                 | 78               | –          | No                 | (+)       | n/a                  |
| FF57 | S02-1928  | NEPC        | –                 | 79               | yes        | No                 | (+)       | n/a                  |
| FF59 | S12-2609  | NEPC        | 0.7               | 65               | yes        | No                 | (–)       | FF58                 |

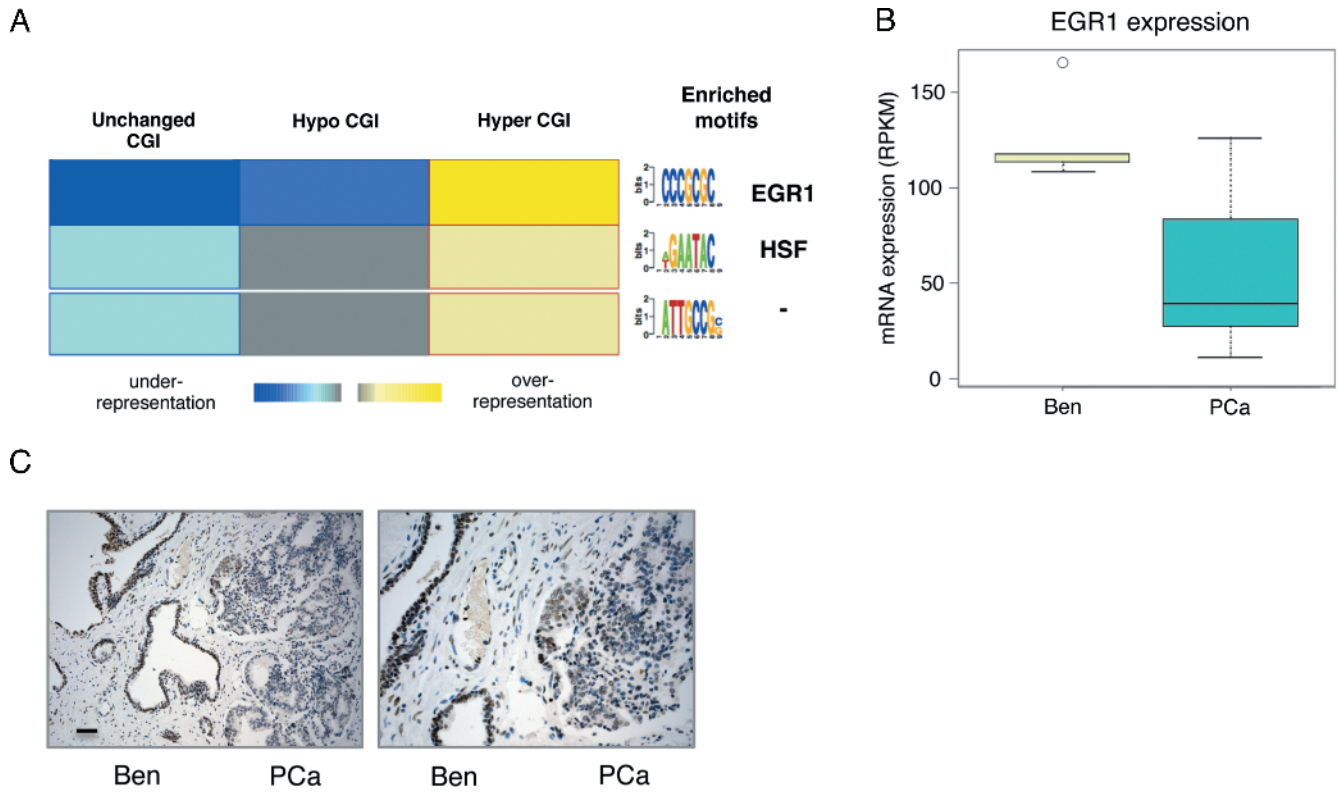

**Figure W1.** Possible involvement of EGR1 in DNA hypermethylation. (A) Motif analysis of hypermethylated and hypomethylated CGIs. (B) EGR1 mRNA expression between benign prostate tissues and PCa. (C) Immunohistochemistry staining of EGR1 in patient 4 is shown here. Left:  $\times 20$ ; scale bar,  $100 \mu\text{m}$ ; right:  $\times 40$ .

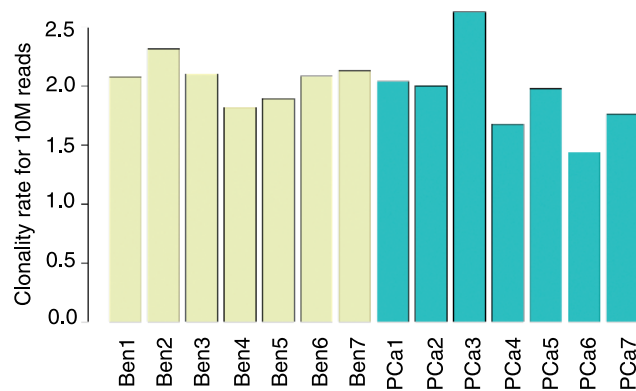

**Figure W2.** PCR duplicates and clonal reads do not explain differences in ASM. Clonality rate for 10 million reads in benign prostate tissue and PCa.

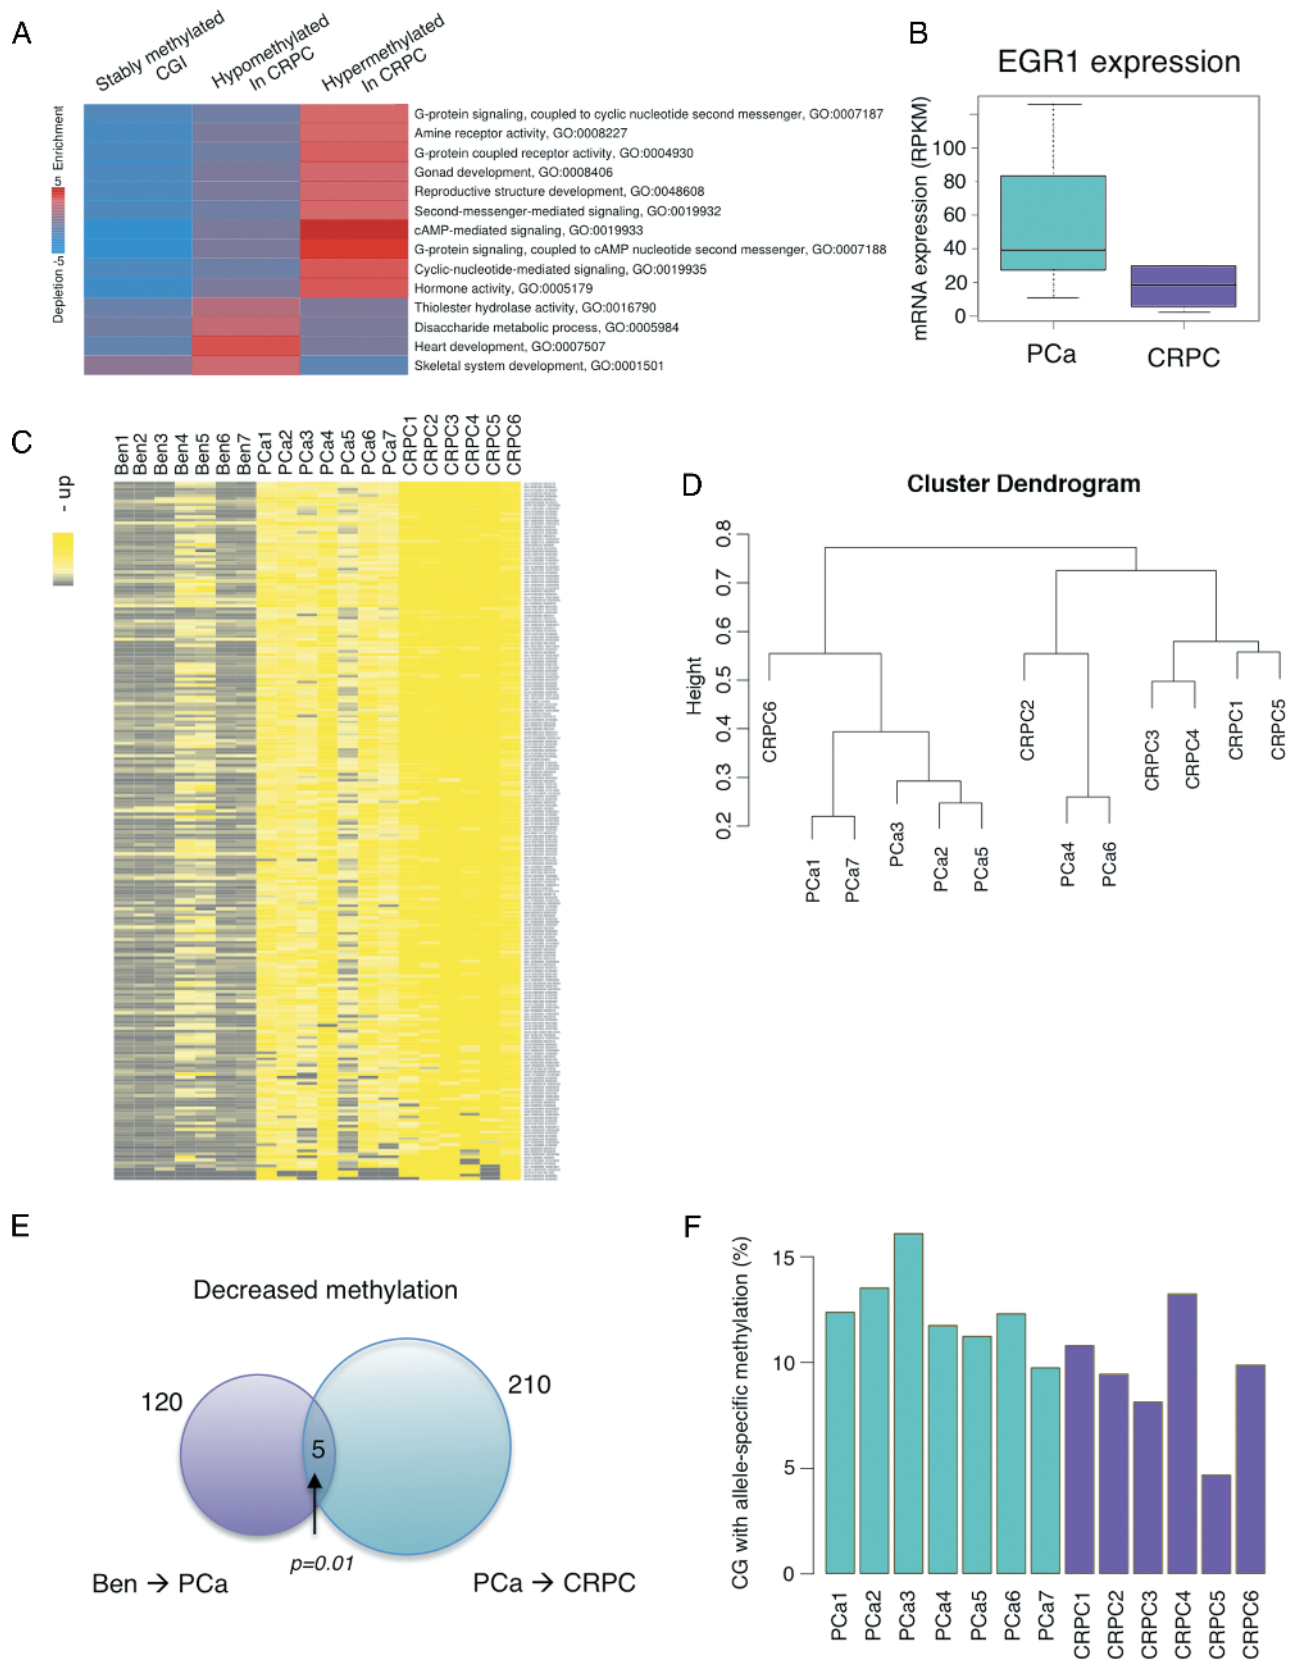

**Figure W3.** Pathway analysis and comparison between PCa and CRPC. (A) The enriched pathways associated with DNA methylation status in CRPC; red, enrichment; blue, depletion. (B) EGR1 mRNA expression between PCa and CRPC. (C) Heat map of the 228 CGIs. (D) Cluster dendrogram of PCa and CRPC using the 228 CGIs. (E) Venn diagram displays the methylation overlap observed between two sections: decreased methylation from benign prostate tissues to PCa and decreased methylation from PCa to CRPC; the inset number represents the coverage in each section. Five CGIs appear in both sections with  $P = .01$ . (F) Percentage of CpG with ASM in PCa and CRPC. Only CpG with nearby SNPs are used for this analysis.

**Table W3.** The Panel of the 13 CGIs and the Associated Genes.

| No. | Chr   | Start     | End       | Gene           | Description                                    | DIST | EXP  | Benign  | PCa    | CRPC   |
|-----|-------|-----------|-----------|----------------|------------------------------------------------|------|------|---------|--------|--------|
| 1   | chr12 | 75601081  | 75601752  | <i>KCNC2</i>   | Potassium voltage-gated channel subfamily C    | 2095 | Up   | 4.644   | 6.035  | 11.677 |
| 2   | chr16 | 67427284  | 67428950  | <i>ZDHHC1</i>  | Probable palmitoyltransferase ZDHHC1           | 204  | Down | 8.21    | 7.266  | 5.733  |
| 3   | chr22 | 19746924  | 19747141  | <i>TBX1</i>    | T-box transcription factor TBX1 isoform C      | 2808 | Up   | 2.078   | 3.865  | 9.733  |
| 4   | chr2  | 85640969  | 85641259  | <i>CAPG</i>    | Macrophage-capping protein                     | 83   | Down | 22.958  | 11.654 | 8.677  |
| 5   | chr7  | 150037459 | 150039031 | <i>RARRES2</i> | Retinoic acid receptor responder protein 2     | 518  | Down | 77.08   | 48.548 | 15.319 |
| 6   | chr12 | 52400467  | 52401696  | <i>GRASP</i>   | General receptor for phosphoinositides         | 335  | Down | 9.953   | 4.452  | 2.018  |
| 7   | chr11 | 64815040  | 64815722  | <i>SAC3D1</i>  | SAC3 domain-containing protein 1               | 3081 | Up   | 4.907   | 6.564  | 19.878 |
| 8   | chr19 | 16186789  | 16188275  | <i>TPM4</i>    | Tropomyosin $\alpha$ -4 chain isoform 2        | 398  | Down | 42.185  | 23.212 | 14.138 |
| 9   | chr11 | 67350928  | 67351953  | <i>GSTP1</i>   | Glutathione S-transferase P                    | 376  | Down | 168.097 | 62.937 | 42.57  |
| 10  | chr14 | 36991594  | 36992488  | <i>NKX2-1</i>  | Homeobox protein Nkx-2.1 isoform 2             | 2611 | Up   | 0.014   | 1.817  | 66.708 |
| 11  | chr3  | 58572478  | 58572903  | <i>FAM107A</i> | Downregulated in renal cell carcinoma          | 9200 | Down | 18.921  | 3.797  | 1.016  |
| 12  | chr20 | 45279781  | 45280169  | <i>SLC13A3</i> | Solute carrier family 13 member 3 isoform a    | 125  | Down | 6.766   | 6.334  | 3.648  |
| 13  | chr3  | 99594969  | 99595215  | <i>FILIP1L</i> | Filamin A interacting protein 1-like isoform 1 | 46   | Down | 22.005  | 5.101  | 1.525  |

**Table W4.** MassARRAY EpiTYPER Primers of the 13 CGIs.

| No.   | Chr   | Start     | End       | Gene           | DIST | Forward                                  | Reverse                                                  |
|-------|-------|-----------|-----------|----------------|------|------------------------------------------|----------------------------------------------------------|
| Epi1  | chr12 | 75601081  | 75601752  | <i>KCNC2</i>   | 2095 | aggaagagagGTAGTATTTTAAAGATTTTGTTTGGAAT   | cagtaatacgactcactataggagaaggctATACCCCAAAAAACCAACTCCT     |
| Epi2  | chr16 | 67427284  | 67428950  | <i>ZDHHC1</i>  | 204  | aggaagagagGGTTTTTGGAGAAATAGTTTTTTA       | cagtaatacgactcactataggagaaggctTACTCCAAACTCTAAATCCTACCCA  |
| Epi3  | chr22 | 19746924  | 19747141  | <i>TBX1</i>    | 2808 | aggaagagagAAGAGGGTTTTGTATTTTAGGGTG       | cagtaatacgactcactataggagaaggctCTAAAAACTCACCTTCCATATCCCT  |
| Epi4  | chr2  | 85640969  | 85641259  | <i>CAPG</i>    | 83   | aggaagagagGGTTGTTATTAGTTTTAAAGTGGGGG     | cagtaatacgactcactataggagaaggctACCTAAAAACTCACCTTCCATATCC  |
| Epi5  | chr7  | 150037459 | 150039031 | <i>RARRES2</i> | 518  | aggaagagagGGAGATTTAGGGAGAGATATAATGGG     | cagtaatacgactcactataggagaaggctATAAAATTCCTCCAAAACCACCTAC  |
| Epi6  | chr12 | 52400467  | 52401696  | <i>GRASP</i>   | 335  | aggaagagagAGGATAGAGATAGTTTTAGGTAAGTTGA   | cagtaatacgactcactataggagaaggctAAAAATCCAAAAACAATAACCCTC   |
| Epi7  | chr11 | 64815040  | 64815722  | <i>SAC3D1</i>  | 3081 | aggaagagagTTTTTTTATTTTTTTGGTTGATAGAGAAG  | cagtaatacgactcactataggagaaggctAAAAACCAATAATCTTTCTCCCT    |
| Epi8  | chr19 | 16186789  | 16188275  | <i>TPM4</i>    | 398  | aggaagagagGAGGAAAAGATGTGAAAATTTTATT      | cagtaatacgactcactataggagaaggctCCACAACACTATAAAAAATACCCCTT |
| Epi9  | chr11 | 67350928  | 67351953  | <i>GSTP1</i>   | 376  | aggaagagagTTTTGTTGTTGTTTATTTTTTAGG       | cagtaatacgactcactataggagaaggctTACTAAAAACTCTAAACCCCATCCC  |
| Epi10 | chr14 | 36991594  | 36992488  | <i>NKX2-1</i>  | 2611 | aggaagagagGGGAAGAGAAGGATATTTGTATTTTT     | cagtaatacgactcactataggagaaggctTTAAACCCTACCCTACCCTAACC    |
| Epi11 | chr3  | 58572478  | 58572903  | <i>FAM107A</i> | 9200 | aggaagagagGTTTTTTTATTGTAGAGTTAGTATTGTTGG | cagtaatacgactcactataggagaaggctACACCTACCCTAACCCCTACCC     |
| Epi12 | chr20 | 45279781  | 45280169  | <i>SLC13A3</i> | 125  | aggaagagagGATTTAGAAGGTAGGGTGGGATTTA      | cagtaatacgactcactataggagaaggctCTTTTCTCCAAAAAACAACAAAA    |
| Epi13 | chr3  | 99594969  | 99595215  | <i>FILIP1L</i> | 46   | aggaagagagGATTTGTTATTTGGTTGTTGATAG       | cagtaatacgactcactataggagaaggctTACCTCCCAATAACTTTTATTAACCC |

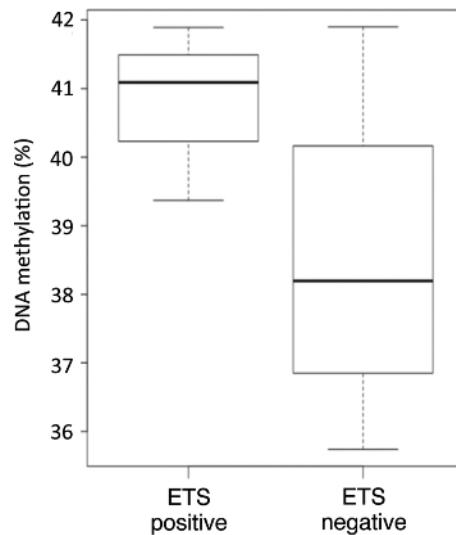

**Figure W4.** DNA methylation levels in *TMPRSS2:ERG* fusion-positive and fusion-negative samples.
